# Supplementary material for: Location-dependent sensing of nitric oxide and calcium ions in living rat kidney using an amperometric/potentiometric dual microsensor
Source: Royal Society of Chemistry journal article supplement (doi:10.1039/c5an01804h), 2015-11-09
Supplement: c5an01804h1.pdf [file c5an01804h1.pdf]

**Supplementary Data for**

**Location-Dependent Sensing of Nitric Oxide and Calcium Ion at  
Living Rat Kidney Using an Amperometric/Potentiometric Dual  
Microsensor**

Yee Seul Kim,<sup>a</sup> Yejin Ha,<sup>a</sup> Jungeun Sim,<sup>b</sup> Minah Suh,<sup>b,c,d,\*</sup> Youngmi Lee<sup>a,\*</sup>

<sup>a</sup> *Department of Chemistry and Nano Science, Ewha Womans University, Seoul, 120-750, Korea*

<sup>b</sup> *Center for Neuroscience Research Imaging (CNIR), Institute for Basic Science (IBS), Suwon  
440-746, Republic of Korea*

<sup>c</sup> *Department of Biomedical Engineering, Sungkyunkwan University, Suwon, 440-746, Republic  
of Korea*

<sup>d</sup> *Samsung Advanced Institute of Health Science and Technology (SAIHST), Sungkyunkwan  
University, Suwon, 440-746, Republic of Korea*

\*Co-corresponding authors: (Fax) +82-2-3277-2384, (E-mail) [youngmilee@ewha.ac.kr](mailto:youngmilee@ewha.ac.kr) (Y. Lee)  
and [minahsuh@skku.edu](mailto:minahsuh@skku.edu) (M. Suh).

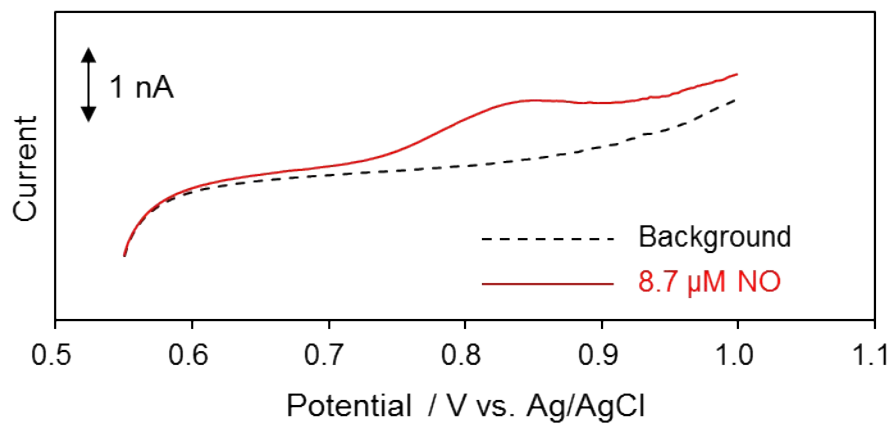

**Fig. S1.** Linear sweep voltammetry curves for NO oxidation obtained with WE1 (25  $\mu\text{m}$  in diameter) of a NO/ $\text{Ca}^{2+}$  dual microsensor in a deaerated PBS solution (pH = 7.4). Scan rate; 20  $\text{mV s}^{-1}$ .

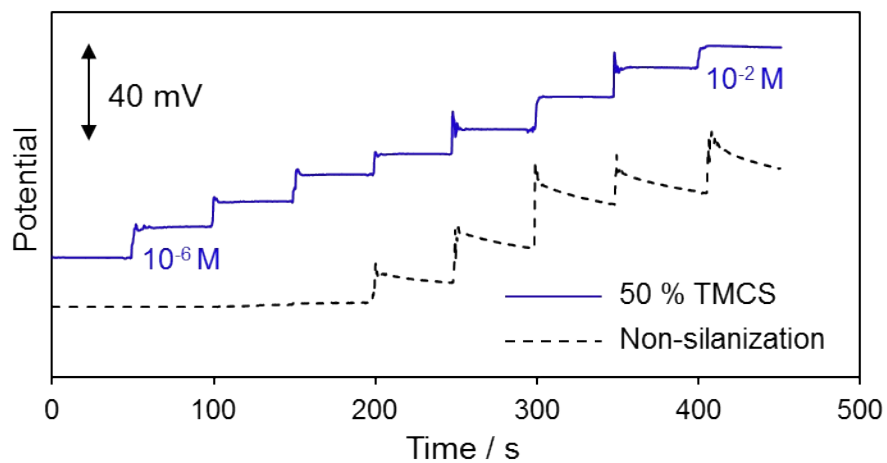

**Fig. S2.** Dynamic potentiometric response curves to  $\text{Ca}^{2+}$  from  $10^{-6}$  M to  $10^{-2}$  M obtained with two different WE2 electrodes of a dual sensor. Blue solid line: pretreated with a solution of TMCS in toluene (1:1, v/v). Black dashed line: without the pretreatment.

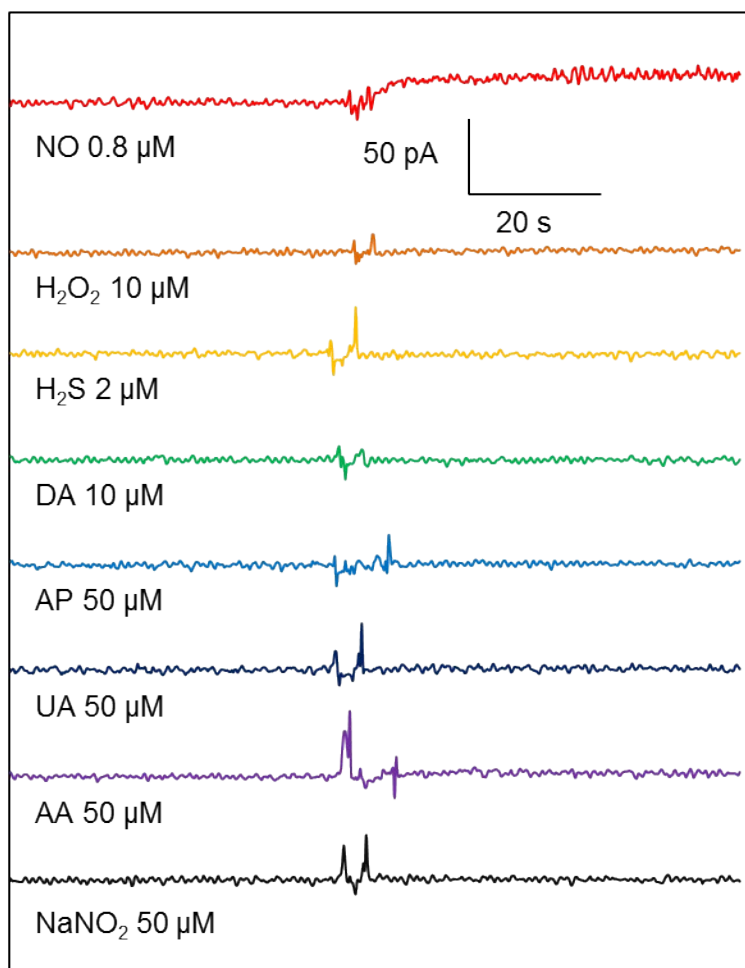

**Fig. S3.** Amperometric responses of WE1 to typical interfering agents: 50 μM nitrite, 50 μM AA, 50 μM UA, 50 μM AP, 10 μM DA, 2 μM H<sub>2</sub>S, and 10 μM H<sub>2</sub>O<sub>2</sub>. The current response to 0.8 μM NO was also showed.

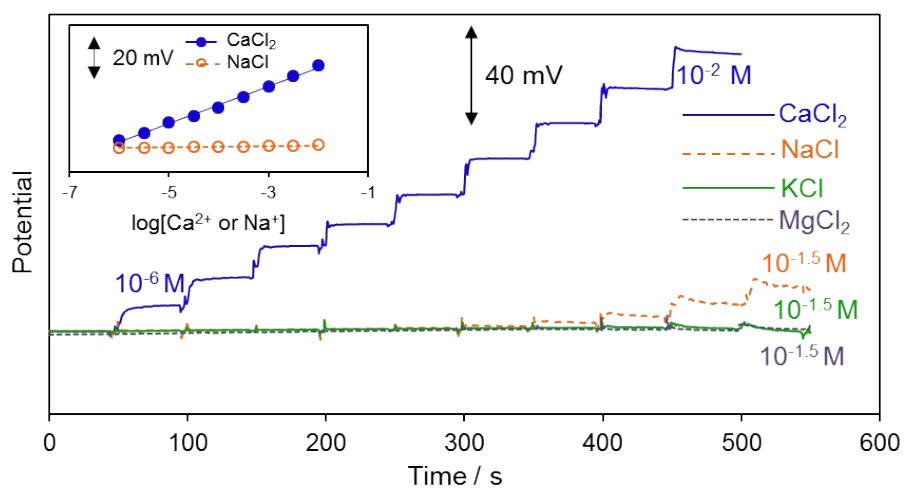

**Fig. S4.** Potentiometric response curves of WE2 to various cations to determine the selectivity coefficient ( $\log K_{Ca^{2+},X}^{Pot}$ , X = Na<sup>+</sup>, K<sup>+</sup>, and Mg<sup>2+</sup>) at calcium detection limit.

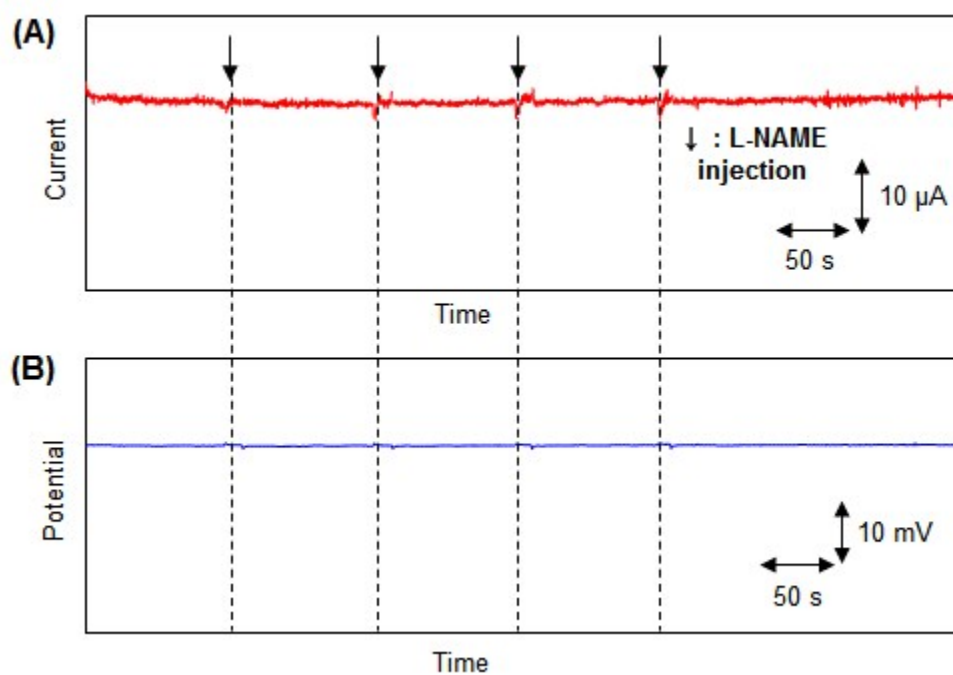

**Fig. S5.** Amperometric and potentiometric response curves of (A) WE1 and (B) WE2 to the L-NAME additions. Four successive injections of L-NAME standard solution (marked with arrows) made the final 10 mM of L-NAME in a tested solution. A NO/Ca<sup>2+</sup> dual microsensor did not respond to L-NAME.

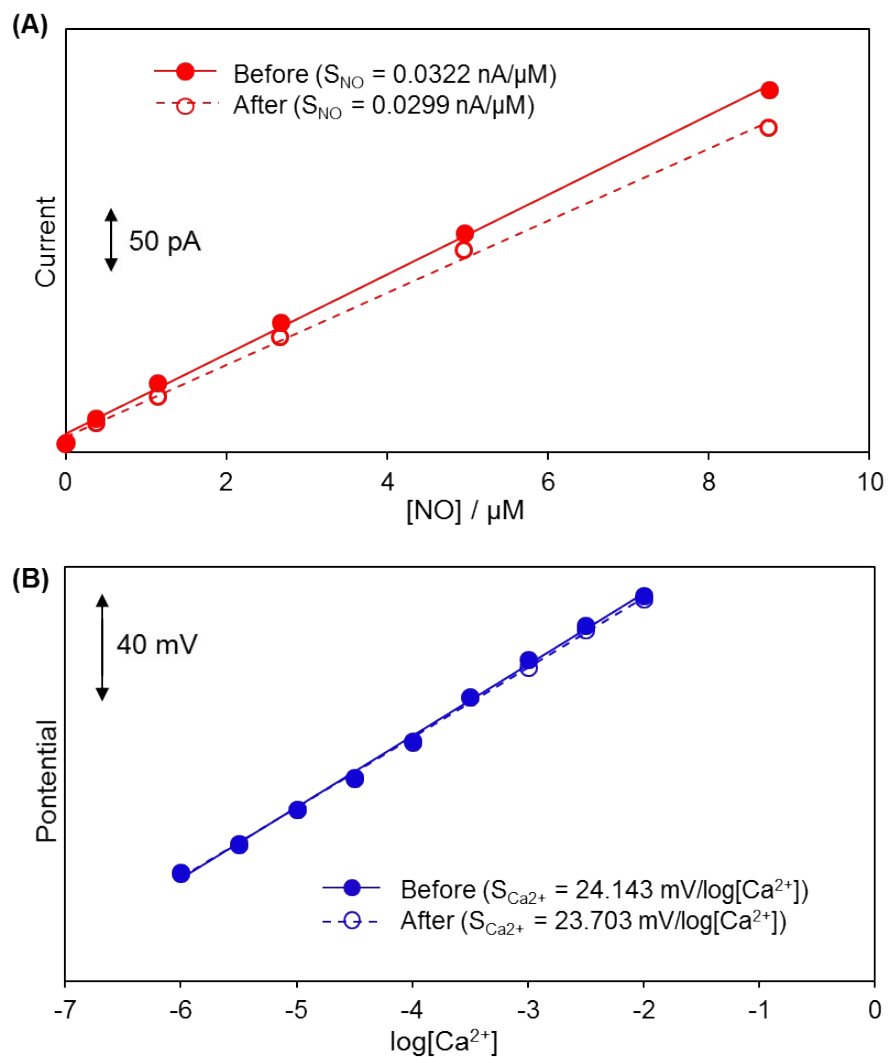

**Fig. S6.** Calibration curves of a NO/Ca<sup>2+</sup> dual microsensor before (full circle symbols) and after (empty circle symbols) kidney tissue experiments. (A) Amperometric responses of WE1. (B) Potentiometric responses of WE2. The obtained sensitivities are also provided.  $S_{\text{NO}}$  and  $S_{\text{Ca}^{2+}}$  mean the sensor sensitivities to NO and Ca<sup>2+</sup>, respectively.
